# Supplementary material for: Classification and citation analysis of the 100 top-cited articles on nurse resilience using chord diagrams: A bibliometric analysis
Source: PubMed Central journal article supplement — Medicine (Baltimore). 2023 Mar 17;102(11):e33191. doi: 10.1097/MD.0000000000033191 (PMC10019250; doi:10.1097/md.0000000000033191), 2023-03-17
Supplement: medi-102-e33191-s002.pdf [file medi-102-e33191-s002.pdf]

# How to conduct this study

| A          | B         | C            | D             | E                                   | F                       | G                | H                         | I       | J       | K          | L                                             | M           | N        | O        |
|------------|-----------|--------------|---------------|-------------------------------------|-------------------------|------------------|---------------------------|---------|---------|------------|-----------------------------------------------|-------------|----------|----------|
| Times Cite | Publisher | Journal ISI  | PT            | Authors                             | Author Full             | Columns          | Theme                     | Country | Country | Research   | Keywords                                      | Keywords    | Keywords | Keywords |
| 514        | 2007      | J. Adv. Nu   | Jackson, I    | Jackson, I                          | Jackson, Debra; Firtk   | Jackson, Debra   | artificial intelligence   |         |         | Nursing    | Univ West Jackson, D (correspo                | burnout; m  |          |          |
| 261        | 2015      | Am. J. Crit  | Rushton, C    | Rushton, C                          | Rushton, Cynda Hytt     | Rushton, Cyn     | artificial intelligence   |         |         | General &  | [Rushton, Rushton, CH (corres                 |             |          |          |
| 257        | 2009      | Nurse Edu    | McAllister, M | McAllister, M                       | McAllister, Margaret    | McAllister, Ma   | artificial intelligence   |         |         | Education  | [McAllister McAllister, M (corres             | Resilience  |          |          |
| 235        | 2012      | Int. J. Nurs | Mealer, M     | Mealer, M                           | Mealer, Meredith; Jon   | Mealer, Mered    | artificial intelligence   |         |         | Nursing    | [Mealer, M Mealer, M (correspor               | Resilience  |          |          |
| 214        | 2014      | J. Nurs. M   | Hart, Patri   | Hart, PL; E Hart, Patricia L.; Bran | Hart, Patricia L        | Hart, Patricia L | artificial intelligence   |         |         | Business   | [Hart, Patr Hart, PL (correspond              | integrative |          |          |
| 170        | 2017      | Int. J. Nurs | Delgado, C    | Delgado, C                          | Delgado, Cynthia; Up    | Delgado, Cynt    | risk                      |         |         | Nursing    | [Delgado, Delgado, C (correspo                | Resilience  |          |          |
| 157        | 2007      | J. Adv. Nu   | Glasberg, G   | Glasberg, G                         | Glasberg, A. L.; Eriks  | Glasberg, A. L   | artificial intelligence   |         |         | Nursing    | Umea Univ Glasberg, AL (corres burnout; c     |             |          |          |
| 147        | 2014      | J. Nurs. M   | Hegney, D     | Hegney, D                           | Hegney, Desley G.; C    | Hegney, Desle    | artificial intelligence   |         |         | Business   | [Hegney, I Hegney, DG (corres; anxiety; c     |             |          |          |
| 125        | 2007      | J. Adv. Nu   | Gillespie, E  | Gillespie, E                        | Gillespie, Brigid M.; C | Gillespie, Brigi | artificial intelligence   |         |         | Nursing    | Griffith Un Gillespie, BM (corres empirical r |             |          |          |
| 104        | 2014      | Am. J. Crit  | Mealer, M     | Mealer, M                           | Mealer, Meredith; Cor   | Mealer, Mered    | artificial intelligence   |         |         | General &  | [Mealer, M Mealer, M (correspor               |             |          |          |
| 103        | 2018      | J. Clin. Nu  | Guo, Yu-f     | Guo, YF; I Guo, Yu-fang; Luo, Y     | Guo, Yu-fang            | Zhang, Jing-pi   | risk                      |         |         | Nursing    | [Guo, Yu- Zhang, JP (correspoi                | burnout; n  |          |          |
| 102        | 2014      | Nurse Edu    | Beauvais, A   | Beauvais, A                         | Beauvais, Audrey M      | Beauvais, Auc    | epidemiology              |         |         | Education  | [Beauvais Beauvais, AM (corre                 | Academic    |          |          |
| 100        | 2019      | Int. J. Nurs | Yu, Fiona     | Yu, F; Raç Yu, Fiona; Raphael, C    | Yu, Fiona(Nev           | Yu, Fiona(Nev    | artificial intelligence   |         |         | Nursing    | [Yu, Fiona Yu, F (corresponding               | Burnout; C  |          |          |
| 95         | 2009      | Int. J. Nurs | Gillespie, E  | Gillespie, E                        | Gillespie, Brigid M.; C | Gillespie, Brigi | radiology                 |         |         | Nursing    | [Gillespie, Gillespie, BM (corres             | Age; Educ   |          |          |
| 84         | 2016      | Nurse Edu    | Thomas, L     | Thomas, L                           | Thomas, Lisa Jean; A    | Thomas, Lisa     | epidemiology              |         |         | Education  | [Thomas, I Thomas, LJ (corres                 | Resilience  |          |          |
| 81         | 2017      | Intensive C  | Arrogante     | Arrogante                           | Arrogante, Oscar; A     | Arrogante, Os    | neural networks, computer |         |         | Nursing    | [Arrogante Arrogante, O (corres               | Burnout; C  |          |          |
| 81         | 2012      | Nurse Edu    | McDonald, J   | McDonald, J                         | McDonald, Glenda; Jc    | McDonald, Gle    | artificial intelligence   |         |         | Education  | [McDonald McDonald, G (corres                 | Work-basi   |          |          |
| 79         | 2010      | J. Pediatr   | Zander, M     | Zander, M                           | Zander, Melissa; Hut    | Zander, Melis    | radiology                 |         |         | Oncology;  | [Hutton, A Zander, M (correspo                | pediatric o |          |          |
| 77         | 2005      | Int. J. Men  | Edward, K     | Edward, K                           | Edward, Karen-leigh     | Edward, Kare     | artificial intelligence   |         |         | Nursing;   | P Deakin Un Edward, KL (corresp               | community   |          |          |
| 76         | 2010      | Oncol. Nu    | Grafton, E    | Grafton, E                          | Grafton, Eileen; Gilles | Grafton, Eilee   | artificial intelligence   |         |         | Oncology;  | [Grafton, I Grafton, E (correspo              |             |          |          |
| 71         | 2017      | Nurse Edu    | Smith, Gra    | Smith, GD; Smith, Graeme D.; Yz     | Smith, Graeme           | Yang, Fang(C     | neural networks, computer |         |         | Education  | [Yang, Fai Yang, F (correspond                | Nurse edu   |          |          |
| 69         | 2010      | Australas    | Cameron, C    | Cameron, C                          | Cameron, Fiona; Bro     | Brownie, Son     | neural networks, computer |         |         | Geriatrics | [Brownie, Brownie, S (correspoi               | aged care   |          |          |
| 68         | 2010      | Int. J. Men  | Matos, Pat    | Matos, PS                           | Matos, Patricia S.; Ne  | Matos, Patrici   | epidemiology              |         |         | Nursing;   | P [Matos, Pa Matos, PS (correspoi             | job satisf  |          |          |
| 65         | 2019      | J. Nurs. M   | Wei, Holly    | Wei, H; Ro Wei, Holly; Roberts, F   | Wei, Holly(U            | Wei, Holly(U     | S radiology               |         |         | Business   | [Wei, Holly Wei, H (correspondin              | nurse bur   |          |          |
| 62         | 2013      | Contemp.     | McDonald, J   | McDonald, J                         | McDonald, Glenda; Jc    | McDonald, Gle    | artificial intelligence   |         |         | Nursing    | [McDonald McDonald, G (corres                 | resilience; |          |          |
| 62         | 2012      | J. Adv. Nu   | Pines, Eul    | Pines, EW                           | Pines, Eula W.; Raus;   | Pines, Eula W    | risk                      |         |         | Nursing    | [Pines, Eul Pines, EW (correspoi              | empower     |          |          |
| 61         | 2019      | Int. J. Men  | Foster, Ki    | Foster, K;                          | Foster, Kim; Roche, I   | Foster, Kim(A    | artificial intelligence   |         |         | Nursing;   | P [Foster, KJ Foster, K (correspon            | mental hee  |          |          |
| 59         | 2021      | J. Nurs. M   | Catania, G    | Catania, G                          | Catania, Gianluca; Ze   | Aleo, Giusepp    | artificial intelligence   |         |         | Business   | [Catania, C Aleo, G (correspondi              | COVID-19    |          |          |
| 59         | 2020      | Nurse Edu    | Li, Zhuang    | Li, ZS; Hai Li, Zhuang-Shuang;      | Hasson, Felici          | Hasson, Felici   | artificial intelligence   |         |         | Education  | [Li, Zhuang Hasson, F (correspo               | Resilience  |          |          |
| 58         | 2016      | J. Nurs. M   | Hudgins, T    | Hudgins, T                          | Hudgins, Tracy Ann      | Hudgins, Trac    | artificial intelligence   |         |         | Business   | [Hudgins, Hudgins, TA (corres;                | nurse leac  |          |          |
| 57         | 2018      | Nurse Edu    | Thomas, L     | Thomas, L                           | Thomas, Lisa Jean; A    | Thomas, Lisa     | artificial intelligence   |         |         | Nursing    | [Thomas, I Thomas, LJ (corresp                | Resilience  |          |          |
| 57         | 2017      | Nurse Edu    | Sanderson, B  | Sanderson, B                        | Sanderson, Brooke;      | Sanderson, Broo  | (Australia)               |         |         | Education  | [Sanderson Sanderson, B (corre                | Resilience  |          |          |
| 56         | 2016      | J. Nurs. M   | McDonald, J   | McDonald, J                         | McDonald, Glenda; Jc    | McDonald, Gle    | (Australia)               |         |         | Business   | [McDonald McDonald, G (corres                 | Resilience  |          |          |

Download data from WoS

To extract keywords plus in wos and keywords as well as MeSH in Pubmed

|  | B                       | C                | D                | E                | F       |
|--|-------------------------|------------------|------------------|------------------|---------|
|  | standards               | epidemiology     |                  |                  |         |
|  | hip fracture            | osteoporos       | osteoporotic     | fractures        |         |
|  |                         | osteoporos       | osteoporos       | tooth loss       |         |
|  | diagnostic              | value-based      | purchasing       |                  |         |
|  | methods                 | diagnostic       | imaging          |                  |         |
|  | absorptiom              | bone densi       | deep learni      | diagnostic       | tomogra |
|  | diagnostic              | machine le       | methods          | workflow         |         |
|  | artificial int          | bone densi       | methods          |                  |         |
|  | physiology              | deep learni      | metabolism       |                  |         |
|  | bone densi              | machine le       | diagnostic       | methods          |         |
|  | diagnosis               | methods          | trends           | machine learning |         |
|  | methods                 | diagnostic       | diagnosis        |                  |         |
|  |                         |                  |                  |                  |         |
|  | electronic f            | unsupervised     | machine learning |                  |         |
|  | deep learni             | diagnostic       | imaging          |                  |         |
|  | artificial int          | neural networks, | computer         |                  |         |
|  | artificial intelligence |                  |                  |                  |         |
|  | artificial intr         | radiograph       | radiology        |                  |         |

MeSH in Pubed

|  | A         | B                            | C                  | D                  | E                         | F | G | H        | I            |
|--|-----------|------------------------------|--------------------|--------------------|---------------------------|---|---|----------|--------------|
|  | Pubmed Id |                              |                    |                    |                           |   |   | 70       |              |
|  | 31290297  | artificial intelligence      | radiography, der   | radiology          |                           |   |   | 35751803 | osteopor     |
|  | 29698784  |                              |                    |                    |                           |   |   | 36140424 |              |
|  | 31760458  | artificial intelligence      | diagnosis          |                    |                           |   |   | 35931902 |              |
|  | 33751686  |                              |                    |                    |                           |   |   | 36010220 |              |
|  | 32584712  | diagnosis                    | epidemiology       | machine learning   | adverse effects           |   |   | 36103890 | osteopor     |
|  | 32749735  | electronic health            | unsupervised       | machine learning   |                           |   |   | 35919046 |              |
|  | 31398274  | artificial intelligence      | frailty            | methods            | diagnosis                 |   |   | 35435584 | osteopor     |
|  | 30852715  | absorptiometry, bone density | deep learning      | diagnostic imaging | tomography, x-ray compute |   |   | 35347425 | artificial i |
|  | 32207266  | bone density                 | machine learning   | diagnostic imaging | methods                   |   |   | 35928480 | deep lear    |
|  | 33722728  | fractures, bone              | osteoporosis       |                    |                           |   |   | 35673469 |              |
|  | 30928154  | deep learning                | diagnostic imaging |                    |                           |   |   | 34989149 | artificial i |
|  | 33403479  | standards                    | epidemiology       |                    |                           |   |   | 35646527 |              |
|  | 32989561  | artificial intelligence      | osteoporosis       |                    |                           |   |   | 35626185 |              |
|  | 35347425  | artificial intelligence      |                    |                    |                           |   |   | 35364575 | pedicle sc   |
|  | 34761151  | methods                      | lumbar vertebrae   | diagnosis          | support vector machine    |   |   | 35432776 |              |
|  | 34020078  | fractures, compr             | osteoporotic frac  | spinal fractures   |                           |   |   | 35368375 |              |

To match the two databases with keywords and MeSH terms

|    | C          | D                | E          | F             | G            | H          |
|----|------------|------------------|------------|---------------|--------------|------------|
| 1  |            |                  |            | Have one      | Duplicate    | Space      |
| 2  | BONE-M     | X-RAY AEFIXATION | STRENGT    | MEN           | CT           |            |
| 3  | MEDICA     | SURGEONTOOTH EX  | AMERICA    | OSTEOP        | RISKS        |            |
| 4  | NATION     | FRACTUR          | OSTEOP     | DIAGNOS       | BURDEN       | WOMEN      |
| 5  | BONE-MI    | ARTIFICIA        | TEXTURE    | NEURAL-I      | HIP FRAC     | COMPRES    |
| 6  | ARTIFIC    | HIP FRAC         | OSTEOP     | RADIOGR       | TRAUMA       | CT         |
| 7  | BODY C     | ARTIFICIA        | RISK       | OSTEOP        | PREVALE      | FRACTUR    |
| 8  | COMPU      | BODY CO          | BONE-MI    | AUTOMA        | THORACC      | CT         |
| 9  | BONE-D     | ARTIFICIA        | OSTEOP     | DIAGNOS       | FRACTUR      | WOMEN      |
| 10 | PRIMAR     | RISK             | Machine le | Artificial in | Deep learn   | Endocrinol |
| 11 | Artificial | Convolutio       | Deep learn | Ensemble r    | Fresh fractu | Magnetic r |
| 12 | RADIAT     | CLASSIFIC        | CANCER     | TRAUMA        | RADIOGR      | SEDATIO    |
| 13 | Artificial | Fracture lia     | Automated  | Osteoporos    | Health info  | standards  |
| 14 | TRABEC     | FRACTUR          | HIP FRAC   | RISK-ASSI     | OSTEOP       | IDENTIFY   |
| 15 | CONVOI     | LUMBAR           | VERTEBR    | TEXTURE       | LOW-BAC      | PREDICTI   |
| 16 | FRACH      | TISSUE           | ALEMDR     | STRENGT       | EPIDEMIO     | THERAPY    |

To generate code for pajek software

|    | A                                      | B | C |
|----|----------------------------------------|---|---|
| 1  | *Vertices 242                          |   |   |
| 2  | 1 "artificial intelligence"            |   |   |
| 3  | 2 "osteoporosis"                       |   |   |
| 4  | 3 "machine learning"                   |   |   |
| 5  | 4 "diagnosis"                          |   |   |
| 6  | 5 "artificial-intelligence"            |   |   |
| 7  | 6 "deep"                               |   |   |
| 8  | 7 "classification"                     |   |   |
| 9  | 8 "dental caries"                      |   |   |
| 10 | 9 "osteoporotic fractures"             |   |   |
| 11 | 10 "meta-analysis"                     |   |   |
| 12 | 11 "hip fractures"                     |   |   |
| 13 | 12 "bone-mineral density"              |   |   |
| 14 | 13 "risk"                              |   |   |
| 15 | 14 "fracture liaison service"          |   |   |
| 16 | 15 "automated fracture identification" |   |   |
| 17 | 16 "health informatics"                |   |   |
| 18 | 17 "standards"                         |   |   |

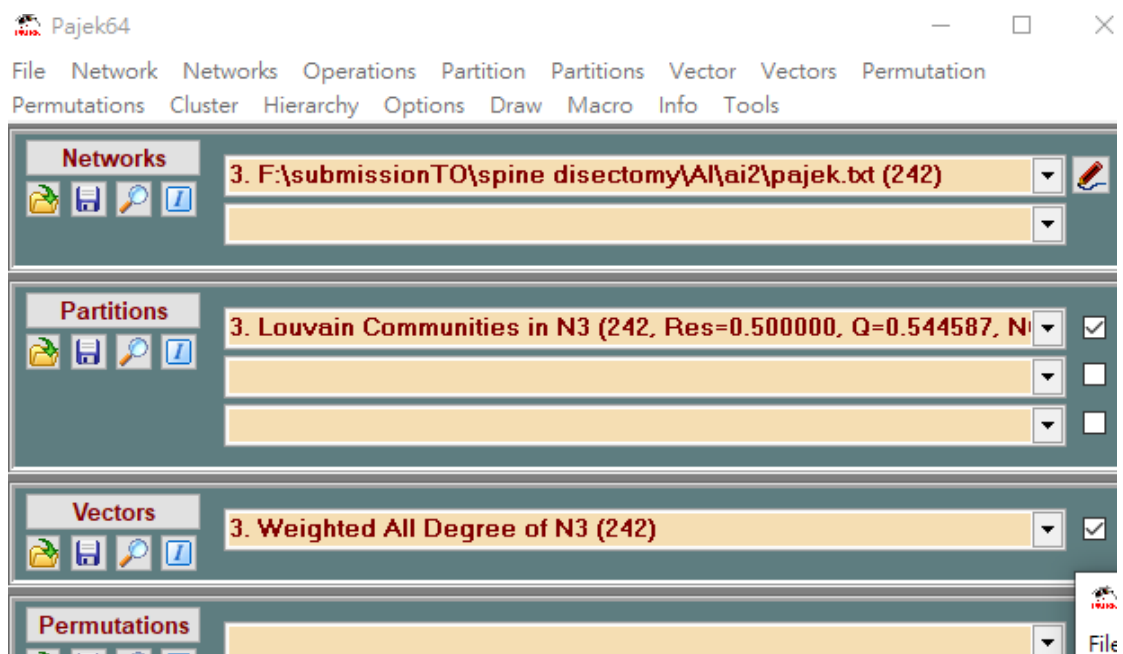

To use Pajek to classify clusters and themes

File Network Networks  
Permutations Cluster Hi

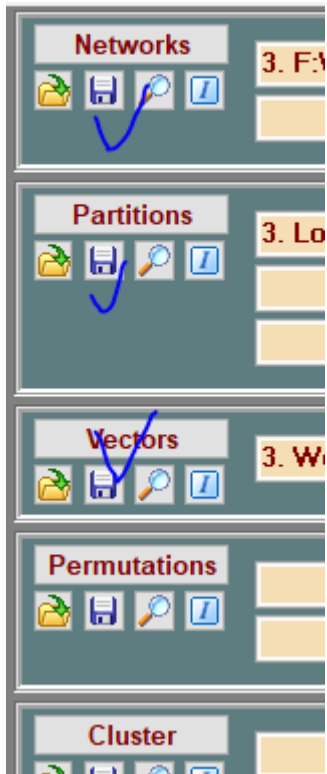

Download data from Pajek to MS Excel



Copy into

To R

<https://r-graph-gallery.com/297-circular-barplot>

```
library(tidyverse)
```

```
# Create dataset
```

```
data <- data.frame(individual=c("Australia","Chi
```

```
# Set a number of 'empty bar' to add
```

```
empty_bar <- 3
```

```
to_add <- data.frame( matrix(NA, e
```

```
colnames(to_add) <- colnames(data)
```

```
), color="black", fontfa  
, angle= label_data$angl
```

```
ion  
ata, aes(x = start, y =  
colour = "black", alpha=  
= FALSE ) +  
, aes(x = title, y = -1  
,0,0,0), colour = "red",  
"bold", inherit.aes = FA
```

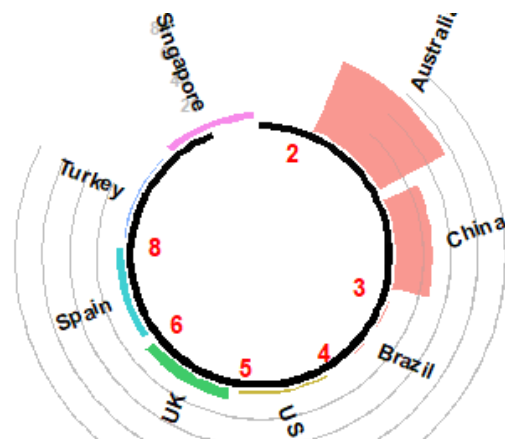

啟用 Windows  
移至 [設定] 以啟用 Windows。



```

haircolors <- c("h-index", "publications", "national heart, lung, and blood institute (us)",
"neurosurgery", "coronavirus", "citation classics", "citation-classics", "citations", "surgery",
"journals", "citation analysis", "bibliometric", "science", "web of science", "impact",
"classification", "artificial intelligence", "cardiology", "heart-failure", "validation",
"citespace", "management", "history", "diagnosis", "genome-wide association")
dimnames(m) <- list(have = haircolors, prefer = haircolors)
groupColors <- c("#DFFF00", "#DFFF00", "#DFFF00", "#DFFF00", "#DFFF00",
"#6495ED", "#6495ED", "#6495ED", "#6495ED", "#6495ED", "#FF7F50", "#FF7F50",
"#FF7F50", "#FF7F50", "#FF7F50", "#CCCCFF", "#CCCCFF", "#CCCCFF", "#CCCCFF",
"#CCCCFF", "#9FE2BF", "#9FE2BF", "#9FE2BF", "#9FE2BF", "#9FE2BF")
p <- chorddiag(m, groupColors = groupColors, groupnamePadding = 20)
p

```

|    | A                         | B  | C  | D  | E  | F  | G | H | I | J | K  | L  | M  | N  | O  | P                         | Q  | R  | S  |    |
|----|---------------------------|----|----|----|----|----|---|---|---|---|----|----|----|----|----|---------------------------|----|----|----|----|
| 1  | 32                        | 1  | 2  | 3  | 4  | 5  | 6 | 7 | 8 | 9 | 10 | 11 | 15 | 16 | 17 | artificial intelligence   | 18 | 19 | 20 | 21 |
| 2  | artificial intelligence   | 13 | 1  |    |    |    |   |   |   |   |    |    |    |    |    | radiology                 |    |    |    |    |
| 3  | artificial intelligence   | 11 |    |    |    |    |   |   |   |   |    |    |    |    |    | risk                      |    |    |    |    |
| 4  | artificial intelligence   | 9  |    |    |    |    |   |   |   |   |    |    |    |    |    | epidemiology              |    |    |    |    |
| 5  | artificial intelligence   | 14 | 1  |    |    |    |   |   |   |   |    |    |    |    |    | neural networks, computer |    |    |    |    |
| 6  | artificial intelligence   | 14 |    | 1  | 1  |    |   |   |   |   |    |    |    |    |    |                           |    |    |    |    |
| 7  | risk                      | 2  | 1  | 8  |    |    |   |   |   |   |    |    |    |    |    |                           |    |    |    |    |
| 8  | artificial intelligence   | 12 | 3  | 2  |    |    |   |   |   |   |    |    |    |    |    |                           |    |    |    |    |
| 9  | artificial intelligence   | 16 |    | 1  | 1  |    |   |   |   |   |    |    |    |    |    |                           |    |    |    |    |
| 10 | artificial intelligence   | 14 |    | 1  |    |    |   |   |   |   |    |    |    |    |    |                           |    |    |    |    |
| 11 | artificial intelligence   | 11 |    |    |    |    |   |   |   |   |    |    |    |    |    |                           |    |    |    |    |
| 12 | risk                      | 4  | 1  | 11 |    |    |   |   |   |   |    |    |    |    |    |                           |    |    |    |    |
| 13 | epidemiology              | 2  |    |    | 5  |    |   |   |   |   |    |    |    |    |    |                           |    |    |    |    |
| 14 | artificial intelligence   | 18 |    |    |    |    |   |   |   |   |    |    |    |    |    |                           |    |    |    |    |
| 15 | radiology                 | 5  | 11 |    |    |    |   |   |   |   |    |    |    |    |    |                           |    |    |    |    |
| 16 | epidemiology              | 4  |    | 1  | 10 | 1  |   |   |   |   |    |    |    |    |    |                           |    |    |    |    |
| 17 | neural networks, computer | 6  |    |    |    | 11 |   |   |   |   |    |    |    |    |    |                           |    |    |    |    |
| 18 | artificial intelligence   | 10 |    |    |    |    |   |   |   |   |    |    |    |    |    |                           |    |    |    |    |
| 19 | radiology                 | 1  | 13 |    |    |    |   |   |   |   |    |    |    |    |    |                           |    |    |    |    |
| 20 | artificial intelligence   | 12 |    |    |    |    |   |   |   |   |    |    |    |    |    |                           |    |    |    |    |
| 21 | artificial intelligence   | 12 | 1  | 2  |    |    |   |   |   |   |    |    |    |    |    |                           |    |    |    |    |
| 22 | neural networks, computer | 3  |    |    |    | 9  |   |   |   |   |    |    |    |    |    |                           |    |    |    |    |
| 23 | neural networks, computer | 4  |    | 1  |    | 14 |   |   |   |   |    |    |    |    |    |                           |    |    |    |    |
| 24 | epidemiology              | 4  |    |    | 10 | 1  |   |   |   |   |    |    |    |    |    |                           |    |    |    |    |
| 25 | radiology                 | 1  | 4  |    |    |    |   |   |   |   |    |    |    |    |    |                           |    |    |    |    |
| 26 | artificial intelligence   | 6  |    |    |    |    |   |   |   |   |    |    |    |    |    |                           |    |    |    |    |
| 27 | risk                      | 3  |    | 11 |    |    |   |   |   |   |    |    |    |    |    |                           |    |    |    |    |
| 28 | artificial intelligence   | 14 |    |    |    |    |   |   |   |   |    |    |    |    |    |                           |    |    |    |    |
| 29 | artificial intelligence   | 11 |    |    |    |    |   |   |   |   |    |    |    |    |    |                           |    |    |    |    |
| 30 | artificial intelligence   | 11 |    |    |    |    |   |   |   |   |    |    |    |    |    |                           |    |    |    |    |
| 31 | artificial intelligence   | 16 | 1  |    |    |    |   |   |   |   |    |    |    |    |    |                           |    |    |    |    |
| 32 | artificial intelligence   | 18 |    |    |    | 1  |   |   |   |   |    |    |    |    |    |                           |    |    |    |    |
| 33 |                           |    |    |    |    |    |   |   |   |   |    |    |    |    |    |                           |    |    |    |    |
| 34 |                           |    |    |    |    |    |   |   |   |   |    |    |    |    |    |                           |    |    |    |    |
| 35 |                           |    |    |    |    |    |   |   |   |   |    |    |    |    |    |                           |    |    |    |    |
| 36 |                           |    |    |    |    |    |   |   |   |   |    |    |    |    |    |                           |    |    |    |    |

Data were organized in MS Excel for use in R language

Downloaded to MS Excel with 20606 records



|    | A                        | B     | C   | D      | E       | F       | G        | H                      | I        | J        | K               |               |
|----|--------------------------|-------|-----|--------|---------|---------|----------|------------------------|----------|----------|-----------------|---------------|
| 1  | d                        | :dddd | FP  | :dddd  | degrees | 45      | 13944    | 0.733215               | 0.615821 | Y        | d               |               |
| 2  | World Psychiatry         | 4869  | 48  | 101.44 |         | 2572.69 | 0.017452 | 3.89182                | 101.44   | 6885.81  | World Psychi    |               |
| 3  | Lancet Psychiatry        | 6459  | 114 | 56.66  |         | 839.1   | 0.785398 |                        |          |          | Journals        |               |
| 4  | Am. J. Psychiat.         | 5732  | 113 | 50.73  |         | 752.16  |          | 1 Compute j, h(region) |          |          |                 |               |
| 5  | Psychother. Psychosom    | 343   | 7   | 49     |         | 711     | 257.83   |                        |          |          |                 |               |
| 6  | JAMA Psychiatry          | 7974  | 198 | 40.27  |         | 699.84  | 1830.99  | 2 Compute j, h(unit)   |          |          |                 |               |
| 7  | Biol. Psychiatry         | 7377  | 217 | 34     |         | 681.4   | 0.140815 |                        |          | 10432.65 | Biol. Psychiat  |               |
| 8  | Depress. Anxiety         | 334   | 10  | 33.4   |         | 612.27  |          | 3 Dept                 |          |          | unit->region    |               |
| 9  | Prog. Molec. Biol. Trans | 56    | 2   | 28     |         | 568.7   | 30       |                        |          |          |                 |               |
| 10 | Mol. Psychiatr.          | 10112 | 430 | 23.52  |         | 567.64  | 0.433542 | 6.600100               | 25.52    | 143      |                 |               |
| 11 | J. Neurol. Neurosurg. P  | 163   | 7   | 23.29  |         | 563.49  |          |                        |          | 230.52   | J. Neurol. Nei  |               |
| 12 | Br. J. Psychiatry        | 2402  | 122 | 19.69  |         | 552.12  | 1305     | 4 Compute j, h(auth)   |          |          | Br. J. Psychiat |               |
| 13 | Brain Behav. Immun.      | 2591  | 132 | 19.63  |         | 544.48  |          |                        |          | 366      |                 |               |
| 14 | Schizophr. Bull.         | 13944 | 745 | 18.72  |         | 541.96  |          | 6.614726               | 18.72    | 1971     | Univ :nouniv    |               |
| 15 | Psychosom. Med.          | 185   | 10  | 18.5   |         | 513.67  |          |                        |          | 5        | 26              |               |
| 16 | Addiction                | 310   | 17  | 18.24  |         | 512.56  |          | 1.2 sorting A-E        |          | 4        | 438.41          | Addiction     |
| 17 | J. Am. Acad. Child Ado   | 739   | 43  | 17.19  |         | 511.04  |          | 3.78419                | 17.19    | 1045.1   | J. Am. Acad.    |               |
| 18 | Neuropsychopharmac       | 4001  | 240 | 16.67  |         | 505.56  |          | 5.484707               | 16.67    | 5658.27  | Neuropsych      |               |
| 19 | Behav. Sleep Med.        | 50    | 3   | 16.67  |         | 498.22  |          |                        |          | 67       | 70.71           | Behav. Sleep  |
| 20 | Curr. Psychiatry Rep.    | 840   | 53  | 15.85  |         | 491.77  |          | 1.3 remove comma       |          | 85       | 1187.94         | Curr. Psychie |
| 21 | Res. Autism Spectr. Dis  | 139   | 9   | 15.44  |         | 457.15  |          | 2.012505               | 15.44    | 196.58   | Res. Autism     |               |
| 22 | Acta Psychiatr. Scand.   | 2691  | 178 | 15.12  |         | 447.48  |          | Degrees(atan(B/C       | 5.12     | 3805.65  | Acta Psychia    |               |
| 23 | Psychol. Med.            | 8396  | 574 | 14.63  |         | 426.04  |          |                        | 4.63     | 11873.74 | Psychol. Med    |               |
| 24 | Transl. Psychiatr.       | 7991  | 560 | 14.27  |         | 424.71  |          | 0.323121               | 14.27    | 11300.98 | Transl. Psych   |               |
| 25 | Drug Alcohol Depend.     | 380   | 27  | 14.07  |         | 416.2   |          | 3.332205               | 14.07    | 537.4    | Drug Alcohol    |               |

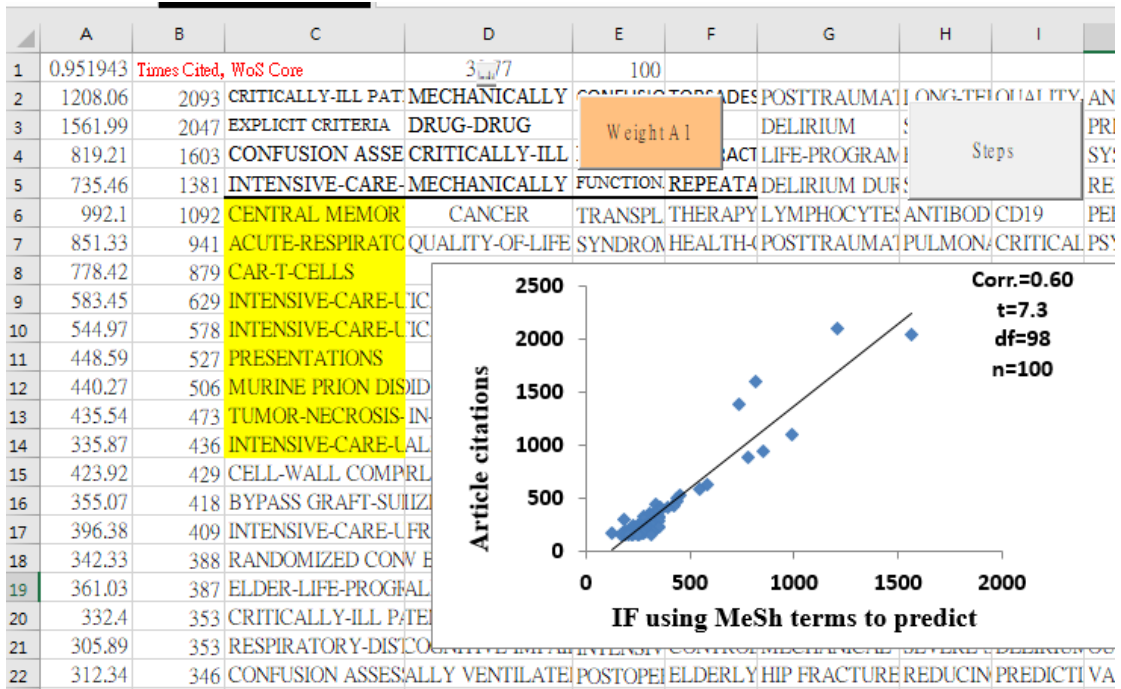

Predict article citations using the keyword IF

|  | F            | G       | H    | I       | J    | K        | L | M | N |
|--|--------------|---------|------|---------|------|----------|---|---|---|
|  | Barr Juliana | 1208.06 | 2093 | 1208.06 | 2093 | DELIRIUM | 1 | 1 |   |
|  | Radcliff Sue | 1561.99 | 2047 | 1561.99 | 2047 | DELIRIUM | 1 | 1 |   |
|  | Inouye Shar  | 819.21  | 1603 | 819.21  | 1603 | DELIRIUM | 1 | 1 |   |
|  | Pandharipa   | 735.46  | 1381 | 735.46  | 1381 | DELIRIUM | 1 | 1 |   |
|  | Kochender    | 992.1   | 1092 | 992.1   | 1092 | DELIRIUM | 1 | 1 |   |
|  | Rogers Jon   | 851.33  | 941  | 851.33  | 941  | DELIRIUM | 1 | 1 |   |
|  | Lee Daniel   | 778.42  | 879  | 778.42  | 879  | DELIRIUM | 1 | 1 |   |
|  | Devlin Johr  | 583.45  | 629  | 583.45  | 629  | DELIRIUM | 1 | 1 |   |
|  | Devlin Johr  | 544.97  | 578  | 544.97  | 578  | DELIRIUM | 1 | 1 |   |
|  | Paterson Ro  | 448.59  | 527  | 448.59  | 527  | BRAIN    | 2 | 2 |   |
|  | Cunningha    | 440.27  | 506  | 440.27  | 506  | BRAIN    | 2 | 2 |   |
|  | Varatharaj   | 435.54  | 473  | 435.54  | 473  | DELIRIUM | 1 | 1 |   |
|  | Salluh Jorge | 335.87  | 436  | 335.87  | 436  | DELIRIUM | 1 | 1 |   |
|  | Hoogland In  | 423.92  | 429  | 423.92  | 429  | DELIRIUM | 1 | 1 |   |
|  | Meybohm F    | 355.07  | 418  | 355.07  | 418  | DELIRIUM | 1 | 1 |   |
|  | Aldecoa Ce   | 396.38  | 409  | 396.38  | 409  | DELIRIUM | 1 | 1 |   |

## Organizing data in MS Excel

responses (rows for person and columns for items)

```

WOS:000401692000017 885 885 503.25 503.25 0.6
WOS:000459483600022 834 834 834 834 0.6
WOS:000584109900033 522 522 395.98 395.98 0.5
WOS:000397324300024 437 437 316.79 316.79 0.4
WOS:000542985400014 426 426 375.15 375.15 0.4
WOS:000398864700008 400 400 339.97 339.97 0.4
WOS:000458891800008 398 398 322.62 322.62 0.4
WOS:000433388700004 357 357 325 325 0.4
WOS:000488278000027 357 357 275.31 275.31 0.4
WOS:000410843500001 351 351 304.28 304.28 0.4
WOS:000411728300021349 349 303.46 303.46 0.4
WOS:000404989700008 313 313 280.28 280.28 0.3
WOS:000465018900027 308 308 282.42 282.42 0.3
WOS:000434408700005 302 302 287.87 287.87 0.3
WOS:000427777900005 301 301 278.9 278.9 0.3
WOS:000393983000009 293 293 271.22 271.22 0.3

```

For the format from differene sources, see below examples...

```

6 ci=885 wi=503.25
6 ci=834 wi=834
5 ci=522 wi=395.98
4 ci=437 wi=316.79
4 ci=426 wi=375.15
4 ci=400 wi=339.97
4 ci=398 wi=322.62
4 ci=357 wi=325
4 ci=357 wi=275.31
4 ci=351 wi=304.28
4 ci=349 wi=303.46
4 ci=313 wi=280.28
4 ci=308 wi=282.42
4 ci=302 wi=287.87
4 ci=301 wi=278.9
4 ci=293 wi=271.22

```

Copy from MS Excel and Paste them onto the boxes: one for data, another for sample size, respectively. Click on the submit bottom, the Forst plot i

Forest Source: [95%CI\_SD]    
 Examples for use in Forest plot  
 SE adjustment(95CIline) [1]  
 se link setting(1 to 10) [0]  
 Forest bubble for type(0 for estimate, 1 for SE: [0] Wider on X: [1] Wider on Y: [1]  
 add X: [0] add Y: [0] add l-line: [0] To left x<0 more: [1] Bubblesize: [1] 啟 移

Article citations(y)

Barr, Juliana(U.S) 2013  
citations=2093

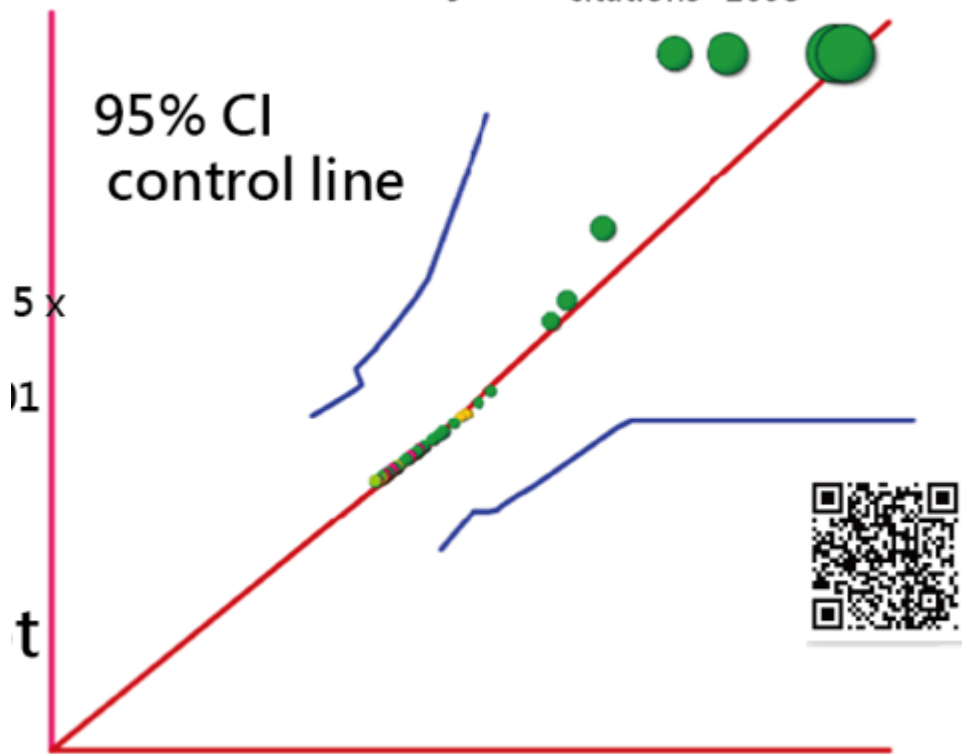

Article citations based on keyword(x)

| U               | V        | W        | X        | Y        | Z        | AA | AB | AC                                            | AD | AE |
|-----------------|----------|----------|----------|----------|----------|----|----|-----------------------------------------------|----|----|
| 1               |          |          |          |          |          |    |    |                                               |    |    |
| U.S             | 0.712145 | 0.712145 | 0.692064 | 0.692064 | 18861.23 |    | 1  | RP=4155 FP=4096 k=0.99 theta=45.41 CJA=1886   |    |    |
| China           | 0.285334 | 0.285334 | 0.299968 | 0.299968 | 9248.93  |    | 1  | RP=1698 FP=1741 k=0.41 theta=44.28 CJA=9248   |    |    |
| Copy 1          | 0.266356 | 0.266356 | 0.314985 | 0.314985 | 8037.53  |    | 1  | RP=1635 FP=1778 k=0.41 theta=42.6 CJA=8037.53 |    |    |
|                 | 0.207913 | 0.207913 | 0.163744 | 0.163744 | 5096.68  |    | 1  | RP=1155 FP=1025 k=0.26 theta=48.41 CJA=5096   |    |    |
|                 | 0.171802 | 0.171802 | 0.167378 | 0.167378 | 4781.06  |    | 1  | RP=1003 FP=990 k=0.24 theta=45.37 CJA=4781.06 |    |    |
|                 | 0.174281 | 0.174281 | 0.165432 | 0.165432 | 4609.78  |    | 1  | RP=1011 FP=985 k=0.24 theta=45.75 CJA=4609.78 |    |    |
| Copy 2          | 0.130445 | 0.130445 | 0.132147 | 0.132147 | 3890.98  |    | 1  | RP=769 FP=774 k=0.19 theta=44.81 CJA=3890.98  |    |    |
|                 | 0.122786 | 0.122786 | 0.123127 | 0.131812 | 3660.96  |    | 1  | RP=722 FP=723 k=0.18 theta=44.96 CJA=3660.96  |    |    |
|                 | 0.126707 | 0.126707 | 0.131812 | 0.100493 | 3179.7   |    | 1  | RP=752 FP=767 k=0.14 theta=44.43 CJA=3179.7   |    |    |
|                 | 0.101514 | 0.101514 | 0.100493 | 0.107897 | 3061.52  |    | 1  | RP=595 FP=592 k=0.15 theta=45.14 CJA=3061.52  |    |    |
| Kings Coll Lond | 0.620289 | 0.620289 | -0.73685 | 0.172427 | 2572.69  |    | 2  | RP=456 FP=497 k=0.96 theta=42.54 CJA=2572.69  |    |    |
| Shanghai Jiao T | 0.245475 | 0.245475 | -0.26539 | 0.120812 | 839.1    |    | 2  | RP=176 FP=183 k=0.36 theta=43.88 CJA=839.1    |    |    |
| Univ Pittsburgh | 0.161511 | 0.161511 | -0.22391 | 0.113013 | 752.16   |    | 2  | RP=124 FP=146 k=0.28 theta=40.34 CJA=752.16   |    |    |
| Ctr Addict & Me | 0.212759 | 0.212759 | -0.19285 | 0.142172 | 711      |    | 2  | RP=146 FP=139 k=0.29 theta=46.41 CJA=711      |    |    |
| Peking Univ(Chi | 0.184248 | 0.184248 | -0.18709 | 0.132384 | 699.84   |    | 2  | RP=130 FP=131 k=0.26 theta=44.78 CJA=699.84   |    |    |
| Karolinska Inst | 0.149396 | 0.149396 | -0.15509 | 0.16957  | 681.4    |    | 2  | RP=106 FP=108 k=0.22 theta=44.46 CJA=681.4    |    |    |
| UCL(U.K)        | 0.156062 | 0.156062 | -0.193   | 0.164518 | 612.27   |    | 2  | RP=116 FP=129 k=0.25 theta=41.96 CJA=612.27   |    |    |
| Columbia Univ(U | 0.136847 | 0.136847 | -0.17094 | 0.165385 | 568.7    |    | 2  | RP=102 FP=114 k=0.22 theta=41.82 CJA=568.7    |    |    |
| Sichuan Univ(C  | 0.12954  | 0.12954  | -0.14661 | 0.145044 | 567.64   |    | 2  | RP=94 FP=100 k=0.2 theta=43.23 CJA=567.64     |    |    |
| Cent South Univ | 0.14158  | 0.14158  | -0.13304 | 0.143309 | 563.49   |    | 2  | RP=98 FP=95 k=0.19 theta=45.89 CJA=563.49     |    |    |
| Psychiat        | -0.63358 | 0.633578 | -0.73219 | 0.140753 | 14603.71 |    | 3  | RP=3253 FP=3497 k=0.97 theta=42.93 CJA=1460   |    |    |
| Psychol         | -0.16245 | 0.162454 | -0.18347 | 0.15615  | 3555.26  |    | 3  | RP=829 FP=881 k=0.25 theta=43.26 CJA=3555.26  |    |    |
| Psychiat & Dev  | 0.07428  | 0.074270 | 0.07233  | 0.151003 | 1894.34  |    | 3  | RP=355 FP=360 k=0.1 theta=44.6 CJA=1894.34    |    |    |

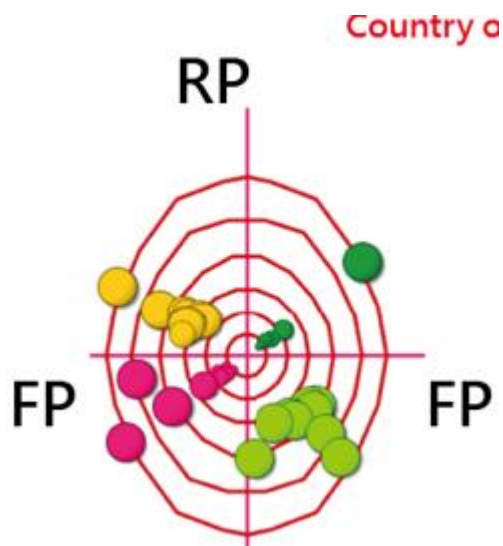

|                         | C                       | D                 | E                 | F                  | G               | H      |
|-------------------------|-------------------------|-------------------|-------------------|--------------------|-----------------|--------|
|                         |                         |                   |                   |                    | Space no use    |        |
| CRITICALLY-ILL PATIENTS | MECHANICALLY            | CONFUSION         | TORSADES          | POSTTRAUMATIC      | LONG-TERM       |        |
| EXPLICIT CRITERIA       | DRUG-DRUG               | DEMENTIA          | RISK              | DELIRIUM           | SLEEP           |        |
| CONFUSION ASSESSMENT    | CRITICALLY-ILL PATIENTS | POSTOPERATIVE     | HIP-FRACTURE      | LIFE-PROGRAM       | FUNCTIONAL      |        |
| INTENSIVE-CARE-UNIT     | MECHANICALLY            | FUNCTIONAL        | REPEATED          | DELIRIUM DURING    | SURVIVAL        |        |
| CENTRAL MEMORY          | CANCER                  | TRANSPLANTATION   | THERAPY           | LYMPHOCYTES        | ANTIBIOTICS     |        |
| ACUTE-RESPIRATORY       | QUALITY-OF-LIFE         | SYNDROME          | HEALTH-RELATED    | POSTTRAUMATIC      | PULMONARY       |        |
| CAR-T-CELLS             | B-CELL                  | CORNELL           | THERAPY           | BLINATUMOMAB       | NEUROTOXICITY   |        |
| INTENSIVE-CARE-UNIT     | CRITICALLY-ILL PATIENTS | MECHANICALLY      | CONFUSION         | QUALITY-OF-LIFE    | POSTTRAUMATIC   |        |
| INTENSIVE-CARE-UNIT     | CRITICALLY-ILL PATIENTS | MECHANICALLY      | ANALGESICS        | LONG-TERM SURVIVAL | RESPIRATORY     |        |
| PRESENTATIONS           | BRAIN                   | COVID-19          | SARS-CoV-2        | encephalitis       | ADEM            |        |
| MURINE PRION DISEASE    | DIPEPTIDYL AMINO ACID   | PRECURSOR PEPTIDE | TRANSGENIC        | LONG-TERM          | CENTRAL-NERVOUS | SYSTEM |
| TUMOR-NECROSIS-FACTOR   | IN-VITRO MODEL          | CENTRAL           | EXPERIMENTAL      | LIPOPOLYSACCHARIDE | EXPERIMENTAL    |        |
| INTENSIVE-CARE-UNIT     | ALLY VENTILATED         | CONFUSION         | RANDOM            | TERM COGNITIVE     | IN-HOSPITAL     |        |
| CELL-WALL COMPONENTS    | EARLY-LIFE INFECTIONS   | MEMORY            | GLIAL ACQUISITION | ADJUNCTIVE         | MOUSE MODEL     |        |
| BYPASS GRAFT-SUMMARY    | CONTROLLED              | ACUTE KIDNEY      | CARDIAC           | MYOCARDIAL         | DOUBLE          |        |

SNA

|    | A                 | B                      | C          |
|----|-------------------|------------------------|------------|
| 1  |                   |                        |            |
| 2  | CRITICALLY-ILL PA | MECHANICALLY V         | 1.29525    |
| 3  | OXIMETRY          | deliberate hypotensic  | 1448.90245 |
| 4  | CRITICALLY-ILL PA | TORSADES-DE-POI        | 0.00956    |
| 5  | CRITICALLY-ILL PA | POSTTRAUMATIC-         | 0.18029    |
| 6  | CRITICALLY-ILL PA | LONG-TERM SEDA         | 0.07279    |
| 7  | CRITICALLY-ILL PA | QUALITY-OF-LIFE        | 0.16103    |
| 8  | CRITICALLY-ILL PA | ANALGESIA-BASE         | 0.03340    |
| 9  | CRITICALLY-ILL PA | CHEST TUBE REMO        | 0.00216    |
| 10 | CRITICALLY-ILL PA | NONSTEROIDAL A         | 0.00480    |
| 11 | CRITICALLY-ILL PA | agitation              | 0.04172    |
| 12 | CRITICALLY-ILL PA | analgesia              | 0.06074    |
| 13 | CRITICALLY-ILL PA | critical care medicine | 0.00543    |
| 14 | CRITICALLY-ILL PA | delirium               | 0.82640    |
| 15 | CRITICALLY-ILL PA | evidence-based medi    | 0.00960    |
| 16 | CRITICALLY-ILL PA | GRADE                  | 0.01605    |
| 17 | CRITICALLY-ILL PA | guidelines             | 0.00911    |
| 18 | CRITICALLY-ILL PA | intensive care         | 0.12588    |
| 19 | CRITICALLY-ILL PA | outcomes               | 0.03153    |

|    | A                          | B | C |
|----|----------------------------|---|---|
| 1  | *Vertices 7552             |   |   |
| 2  | 1 "PSYCHIATRIC-DISORDERS"  |   |   |
| 3  | 2 "RISK"                   |   |   |
| 4  | 3 "SCHIZOPHRENIA"          |   |   |
| 5  | 4 "BLOOD"                  |   |   |
| 6  | 5 "BIPOLAR DISORDER"       |   |   |
| 7  | 6 "DISORDERS"              |   |   |
| 8  | 7 "PHARMACOLOGY"           |   |   |
| 9  | 8 "MECHANISMS"             |   |   |
| 10 | 9 "PSYCHOSIS"              |   |   |
| 11 | 10 "SYMPTOMS"              |   |   |
| 12 | 11 "ANXIETY"               |   |   |
| 13 | 12 "SARS"                  |   |   |
| 14 | 13 "BRAIN"                 |   |   |
| 15 | 14 "1ST-EPISODE PSYCHOSIS" |   |   |
| 16 | 15 "QUALITY-OF-LIFE"       |   |   |
| 17 | 16 "UNIPOLAR DEPRESSION"   |   |   |
| 18 | 17 "DEPRESSIVE SYMPTOMS"   |   |   |
| 19 | 18 "MENTAL-DISORDERS"      |   |   |

Codes for Pajek

Pajek64

File Network Networks Operations Partition Partitions Vector Vectors Permutation Permutations Cluster Hierarchy Options Draw Macro Info Tools

**Networks**  
1. F:\submissionTO\2208scheke\pajek.txt (7552)

**Partitions**  
1. Louvain Communities in N1 (7552, Res=0.500000, Q=0.649255, M)

**Vectors**  
1. Weighted All Degree of N1 (7552)

**Permutations**

Report

File

Saving network to file --- F:\submissionTO\2208scheke\al.net

Time spent: 0:00:00

### A. Keyword cluster

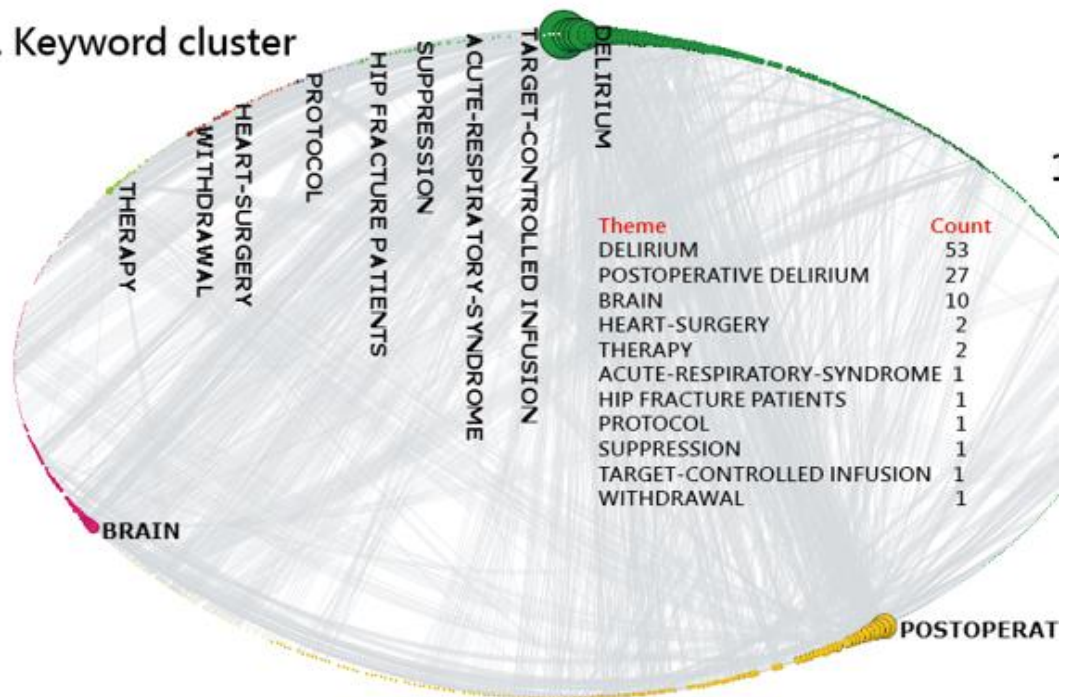

|    | A         | B    | C         | D      | E      | F   | G         | H               | I |
|----|-----------|------|-----------|--------|--------|-----|-----------|-----------------|---|
| 1  | *Vertices | 7552 |           | 7552   |        |     | *Vertices |                 |   |
| 2  |           | 1    | PSYCHIA   | 0.4874 | 0.4499 | 0.5 |           |                 |   |
| 3  |           | 2    | RISK      | 0.409  | 0.5066 | 0.5 |           | Copy coordinate |   |
| 4  |           | 3    | SCHIZOPH  | 0.1975 | 0.8072 | 0.5 |           |                 |   |
| 5  |           | 4    | BLOOD     | 0.205  | 0.6701 | 0.5 |           |                 |   |
| 6  |           | 5    | BIPOLAR   | 0.0896 | 0.5501 | 0.5 |           |                 |   |
| 7  |           | 6    | DISORDE   | 0.2717 | 0.4934 | 0.5 |           | Copy entities   |   |
| 8  |           | 7    | PHARMAC   | 0.2051 | 0.6676 | 0.5 |           |                 |   |
| 9  |           | 8    | MECHAN    | 0.2051 | 0.6667 | 0.5 |           |                 |   |
| 10 |           | 9    | PSYCHOS   | 0.3221 | 0.8677 | 0.5 |           | Clear all       |   |
| 11 |           | 10   | SYMPTOM   | 0.2052 | 0.665  | 0.5 |           |                 |   |
| 12 |           | 11   | ANXIETY   | 0.2053 | 0.6642 | 0.5 |           |                 |   |
| 13 |           | 12   | SARS      | 0.2054 | 0.6633 | 0.5 |           |                 |   |
| 14 |           | 13   | BRAIN     | 0.7661 | 0.1626 | 0.5 |           |                 |   |
| 15 |           | 14   | 1ST-EPISC | 0.1779 | 0.2987 | 0.5 |           | number '+' in C |   |
| 16 |           | 15   | QUALITY   | 0.2054 | 0.6625 | 0.5 |           |                 |   |
| 17 |           | 16   | UNIPOLA   | 0.2055 | 0.6616 | 0.5 |           |                 |   |
| 18 |           | 17   | DEPRESSI  | 0.2056 | 0.6608 | 0.5 |           |                 |   |
| 19 |           | 18   | MENTAL-   | 0.3866 | 0.1682 | 0.5 |           | relations       |   |
| 20 |           | 19   | PATTERN   | 0.4619 | 0.1415 | 0.5 |           |                 |   |

Results from SNA and transform data into data below

|    | A                        | B      | C       | D        | E    |
|----|--------------------------|--------|---------|----------|------|
| 1  |                          | #REF!  | #REF!   | 21881.85 | 0.68 |
| 2  | SCHIZOPHRENIA            | -30.72 | -54.45  | 956.1718 | 0.62 |
| 3  | BIPOLAR DISORDER         | -5.01  | -73.872 | 392.4725 | 0.54 |
| 4  | RISK                     | -0.66  | -16.38  | 339.9538 | 0.53 |
| 5  | METAANALYSIS             | 14.84  | -21.42  | 306.055  | 0.52 |
| 6  | PSYCHOSIS                | -36.77 | -32.022 | 236.1895 | 0.50 |
| 7  | RISK-FACTORS             | -15.91 | -52.938 | 226.7092 | 0.49 |
| 8  | ASSOCIATION              | -15.32 | -52.758 | 208.2116 | 0.49 |
| 9  | SYMPTOMS                 | -16.5  | -53.064 | 206.1575 | 0.48 |
| 10 | 1ST-EPISODE PSYCHOSIS    | 20.13  | -57.978 | 180.7478 | 0.47 |
| 11 | MAJOR DEPRESSIVE DISORDI | -13.32 | -51.444 | 144.7719 | 0.45 |
| 12 | FOLLOW-UP                | -13.17 | -51.3   | 143.2608 | 0.45 |
| 13 | MORTALITY                | -14.18 | -52.128 | 141.502  | 0.45 |

In excel

|    | A                                                                                | B | C | D | E | F | G          | H |
|----|----------------------------------------------------------------------------------|---|---|---|---|---|------------|---|
| 1  | <!--<br>#include<br>file="./A<br>DOFunc<br>ons.asp" --<br>>                      |   |   |   |   |   | google map |   |
| 2  | <!DOCTYPE html PUBLIC "-//W3C//DTD XHTML 1.0 Strict//EN" "http://www.w3.org/TR/x |   |   |   |   |   |            |   |
| 3  | <html>                                                                           |   |   |   |   |   |            |   |
| 4  | <html xmlns="http://www.w3.org/1999/xhtml">                                      |   |   |   |   |   |            |   |
| 5  | <head>                                                                           |   |   |   |   |   |            |   |
| 6  | <meta http-equiv="Content-Type" content="text/html; charset=big5" />             |   |   |   |   |   |            |   |
| 7  | <meta http-equiv="Content-Type" content="text/html; charset=utf-8" />            |   |   |   |   |   |            |   |
| 8  | <title>PaperABC_GoogleMap</title>                                                |   |   |   |   |   |            |   |
| 9  | <meta name="viewport" content="width=device-width; initial-scale=1.0">           |   |   |   |   |   |            |   |
| 10 |                                                                                  |   |   |   |   |   |            |   |
| 11 | ...</script>                                                                     |   |   |   |   |   |            |   |

Got the HTML

|    | A                  | B      | C       | D         | E                      | F          | G       | H         | I              |
|----|--------------------|--------|---------|-----------|------------------------|------------|---------|-----------|----------------|
| 1  | Times Cited, WoS C | Volume | country | institute | Publicatio             | Documen    | dept    | PT        |                |
| 2  | 685                |        | 2017    | U.S       | Northwell Hlth(U.S)    | World Psy  | Article |           | Correll, Chris |
| 3  | 634                |        | 2019    | China     | Peking Univ(China)     | Lancet Ps  | Article | Natl Clin | Huang, Yuec    |
| 4  | 522                |        | 2020    | Spain     | Univ Complutense(Spa)  | Lancet Ps  | Article | Child & A | Moreno, Can    |
| 5  | 437                |        | 2017    | Denmark   | Copenhagen Univ Hosp   | Lancet Ps  | Article | Mental H  | Hjorthoj, Car  |
| 6  | 426                |        | 2020    | U.S       | Univ Calif San Diego(U | Brain Beh  | Review  | Psychiat  | Troyer, Emil   |
| 7  | 400                |        | 2017    | U.K       | Kings Coll London(U.K  | Am. J. Ps  | Review  | Clin Sci  | Howes, Olive   |
| 8  | 396                |        | 2018    | Australia | Univ Queensland(Austr  | Schizophi  | Article |           | Charlson, Fic  |
| 9  | 357                |        | 2018    | U.K       | UCL(U.K)               | BMC Psyc   | Review  | Psychiat  | Wang, Jingyi   |
| 10 | 357                |        | 2019    | Canada    | Margaret & Wallace Mc  | Lancet Ps  | Review  | Margaret  | Lai, Meng-Cl   |
| 11 | 351                |        | 2017    | U.K       | Univ Oxford(U.K)       | Psychol. I | Review  | Psychiat  | Freeman, D.(   |
| 12 | 349                |        | 2017    | Belgium   | Univ Leuven(Belgium)   | World Psy  | Review  | Rehabil S | Vancampfort    |
| 13 | 313                |        | 2017    | Sweden    | Karolinska Inst(Sweder | JAMA Ps    | Article | Clin Neu  | Tiihonen, Jar  |
| 14 | 308                |        | 2019    | U.K       | Kings Coll London(U.K  | Lancet Ps  | Article | Social Ge | Di Forti, Mar  |
| 15 | 302                |        | 2018    | U.S       | Northwell Hlth(U.S)    | JAMA Ps    | Review  | Psychiat  | Correll, Chris |
| 16 | 301                |        | 2018    | U.S       | Univ Wisconsin(U.S)    | Biol. Psyc | Review  | Psychiat  | Hiser, Jaryd(  |
| 17 | 293                |        | 2017    | Switzerla | World Hlth Org(Switze  | World Psy  | Article |           | Liu, Nancy F   |

To draw the Alluvial plot



|    | A  | B           | C    | D           | E  | F    | G          | H           | I   |
|----|----|-------------|------|-------------|----|------|------------|-------------|-----|
| 1  |    |             |      |             | 0  |      |            |             |     |
| 2  | C1 | 2018        | 3850 | Grover, Sar | 34 | 1361 | 2017       | U.S         | 670 |
| 3  | C1 | 2021        | 3747 | Correll, Ch | 33 | 260  | 2019       | China       | 272 |
| 4  | C1 | 2020        | 3732 | Fond, G.(F) | 23 | 242  | China      | Peking Uni  | 138 |
| 5  | C1 | 2019        | 3540 | Kendler, K  | 22 | 245  | 2020       | U.S         | 788 |
| 6  | C1 | 2017        | 3309 | Harvey, Ph  | 20 | 207  | Review     | Psychiat    | 408 |
| 7  | C2 | U.S         | 4096 | Zheng, We   |    | 89   | 2017       | U.K         | 296 |
| 8  | C2 | U.K         | 1778 | Fusar-Poli, |    | 57   | U.K        | Kings Coll  | 511 |
| 9  | C2 | China       | 1741 | Pelizza, Lo | 19 | 129  | 2018       | Australia   | 228 |
| 10 | C2 | Australia   | 1025 | Ohi, Kazut  | 10 | 118  | Schizophr. | Article     | 675 |
| 11 | C2 | Germany     | 990  | Strauss, Gr |    | 7    | 2018       | U.K         | 377 |
| 12 | C3 | Kings Coll  | 497  | Zhuo, Chua  |    | 6    | Psychol. M | Review      | 116 |
| 13 | C3 | Shanghai J  | 183  | Vancampfo   | 16 | 104  | 2019       | U.K         | 336 |
| 14 | C3 | Univ Pittsb | 146  | Moritz, Ste |    | 13   | 2018       | U.S         | 843 |
| 15 | C3 | Ctr Addict  | 139  | Fountoulak  |    | 7    | Psychiat   | Correll, Ch | 37  |
| 16 | C3 | Peking Uni  | 131  | Misiak, Bla | 15 | 85   | Review     | Psychosis S | 72  |
| 17 | C4 | Schizophr   | 1681 | Kishi, Taro | 15 | 81   | Article    | Psychosis S | 180 |

### Nodes and edges constructed

|    | A                      | B  | C  | D  | E  | F | G | H | I |
|----|------------------------|----|----|----|----|---|---|---|---|
| 1  | 101                    | 1  | 2  | 3  | 4  | 5 | 6 | 7 | 8 |
| 2  | DELIRIUM               | 15 |    |    |    |   |   |   |   |
| 3  | DELIRIUM               | 10 |    |    |    |   |   |   |   |
| 4  | POSTOPERATIVE          | 3  | 6  | 1  |    |   |   |   |   |
| 5  | DELIRIUM               | 9  |    |    |    |   |   |   |   |
| 6  | THERAPY                | 1  |    |    | 9  |   |   |   |   |
| 7  | ACUTE-RESPIRAT         | 2  |    |    |    |   |   |   |   |
| 8  | THERAPY                | 2  |    |    | 10 |   |   |   |   |
| 9  | DELIRIUM               | 12 |    |    |    |   |   |   |   |
| 10 | DELIRIUM               | 12 |    |    |    |   |   |   |   |
| 11 | BRAIN                  |    |    | 4  |    |   |   |   |   |
| 12 | BRAIN                  | 2  | 1  | 10 |    |   |   |   |   |
| 13 | BRAIN                  | 1  |    | 12 |    |   |   |   |   |
| 14 | DELIRIUM               | 9  | 1  |    |    |   |   |   |   |
| 15 | BRAIN                  |    |    | 11 |    |   |   |   |   |
| 16 | DELIRIUM               | 7  |    | 1  | 1  |   |   |   |   |
| 17 | HIP FRACTURE P,        | 1  |    |    |    |   |   |   | 9 |
| 18 | DELIRIUM               | 12 |    |    |    |   |   |   |   |
| 19 | POSTOPERATIVE DELIRIUM |    | 10 |    |    |   |   |   |   |

Using the module to classify the category for each article



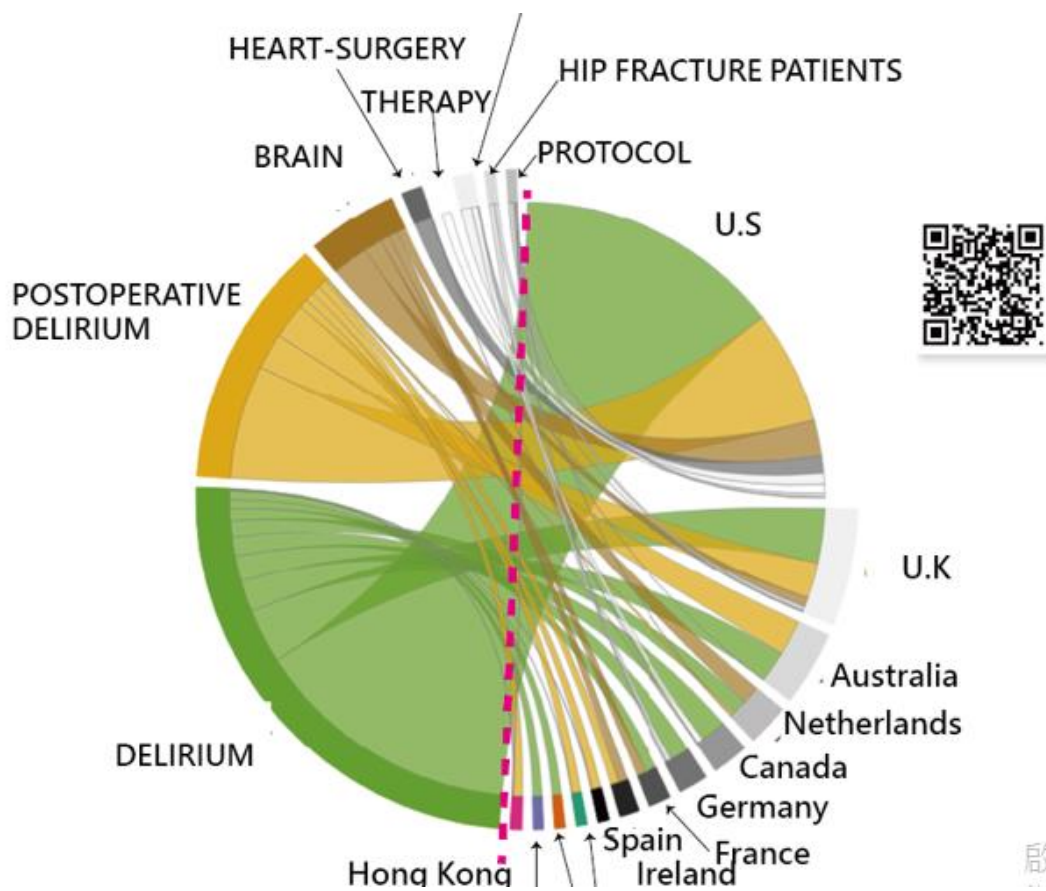

```

library(chorddiag)
students <- as.matrix(data.frame(DELIRIUM =
c(29.75,6.08,3.48,1.81,2.84,2.14,1.32,0,0.09,0.03,1,1,0.07),POSTOPERATIVE_DELIRIUM
= c(12.73,4.02,3.93,0.33,0.07,0,0,0.92,1,1,0,0,1),BRAIN =
c(4,1,0,2,0,0,1,1,0,0,0,0,0),HEART_SURGERY =
c(1.92,0.05,0,0,0.04,0,0,0,0,0,0,0,0),THERAPY =
c(1,0,0,0,0,0,0,0,0,0,0,0,0),ACUTE_RESPIRATORY_SYNDROME =
c(1.2,0.05,0.05,0,0.7,0,0,0,0,0,0,0,0),HIP_FRACTURE_PATIENTS =
c(0.43,0,0,0,0,0.57,0,0,0,0,0,0,0),PROTOCOL =
c(0.06,0.56,0,0.06,0,0.22,0,0,0,0,0,0,0.06)))
row.names(students) <- c("U.S", "U.K", "Australia", "Netherlands", "Canada",
"Germany", "France", "Ireland", "Spain", "South Korea", "Japan", "Pakistan", "Hong
Kong")
chorddiag(students, type = "bipartite", showTicks = FALSE, groupnameFontSize = 14,
groupnamePadding = 10, margin = 90)
ents, type = "bipartite", showTicks = FALSE, groupnameFontSize = 14,
groupnamePadding = 10, margin = 90)

```

啟用

Chien TW. 100 top-cited articles in this study. Online at

<http://www.healthup.org.tw/html100/delirium100.htm> (accessed Oct.4, 2022)

## A. 100 top-cited articles

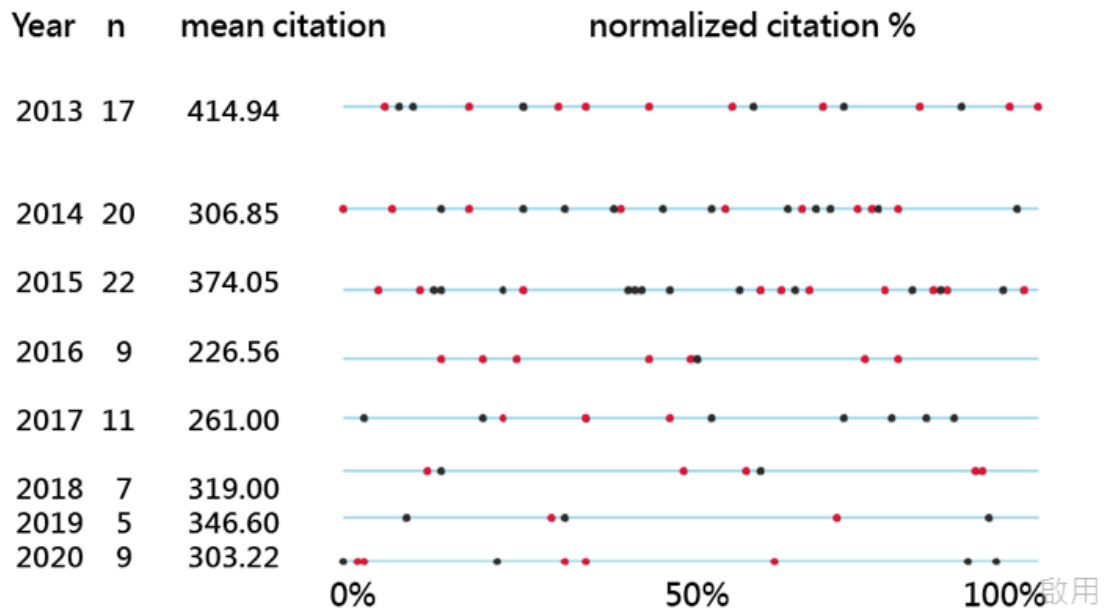

|      |    |       |      |      |       |
|------|----|-------|------|------|-------|
| 2002 | 17 | 38.02 | 0.89 | 1576 | 92.71 |
| 2003 | 11 | 19.81 | 0.58 | 805  | 73.18 |
| 2004 | 14 | 16.78 | 0.69 | 667  | 47.64 |
| 2005 | 18 | 34.84 | 0.83 | 1302 | 72.33 |
| 2006 | 19 | 23.05 | 0.8  | 842  | 44.32 |
| 2007 | 24 | 23.51 | 0.46 | 825  | 34.38 |
| 2008 | 19 | 40.69 | 0.71 | 1346 | 70.84 |
| 2009 | 20 | 25.7  | 0.78 | 854  | 42.7  |
| 2010 | 30 | 18.92 | 0.3  | 596  | 19.87 |
| 2011 | 25 | 40.4  | 0.91 | 1132 | 45.28 |
| 2012 | 22 | 67.83 | 0.83 | 1674 | 76.09 |
| 2013 | 25 | 43.49 | 1.32 | 1043 | 41.72 |
| 2014 | 22 | 39.44 | 0.58 | 929  | 42.09 |
| 2015 | 38 | 54.46 | 1.01 | 1089 | 30.25 |
| 2016 | 34 | 44.32 | 0.61 | 769  | 22.62 |
| 2017 | 27 | 102.6 | 0.57 | 1371 | 50.78 |

Ranked by Pubs by year in columns: Weighted RCR by Year, Median RCR by Year, Total Citations by Publication Year, and Citations per Pub by Year

|          |      |      |      |    |             |        |
|----------|------|------|------|----|-------------|--------|
| 12028544 | 2002 | 0.47 | 25.3 | 20 | 0.638408847 | 9.236  |
| 12050325 | 2002 | 0.51 | 27.8 | 23 | 0.632332683 | 10.057 |
| 12161225 | 2002 | 1.46 | 64.0 | 65 | 0.085679623 | 2.778  |
| 12198440 | 2002 | 0.59 | 31.7 | 22 | 0.011579121 | 19.112 |
| 12422157 | 2002 | 0.88 | 45.7 | 36 | 0.086626296 | 4.749  |
| 12423725 | 2002 | 2.41 | 80.2 | 89 | 0.085558774 | 2.778  |
| 12481248 | 2002 | 0.44 | 23.5 | 17 | 0.011588259 | 11.105 |
| 12571196 | 2003 | 0.42 | 22.7 | 17 | 0.085558774 | 10.057 |
| 12766116 | 2003 | 0.38 | 20.3 | 14 | 0.011606491 | 5.36   |
| 12842235 | 2003 | 0.48 | 25.8 | 20 | 0.632149258 | 2.778  |
| 12918844 | 2003 | 0.19 | 9.3  | 8  | 0.00057649  | 0.5    |
| 12972115 | 2003 | 0.25 | 13.1 | 9  | 0.232544684 | 2.778  |
| 14530201 | 2003 | 1.67 | 69.1 | 75 | 0.085780795 | 29.89  |
| 14609590 | 2003 | 0.26 | 13.5 | 10 | 0.011656231 | 2.778  |
| 14679855 | 2003 | 1.08 | 53.2 | 41 | 7.801125-05 | 15.534 |
| 14697459 | 2004 | 0.38 | 19.3 | 15 | 0.232756404 | 2.778  |

PMID, Year, RCR, NIH Percentile, Total Citations, AWS, SCI\_JIF x-index on column
